# Supplementary material for: Identification of the Anti-Aflatoxinogenic Activity of Micromeria graeca and Elucidation of Its Molecular Mechanism in Aspergillus flavus
Source: PubMed Central journal article supplement (PMC5371842; doi:10.3390/toxins9030087), 2017-03-01
Supplement: toxins-09-00087-s001.pdf [file toxins-09-00087-s001.pdf]

# Supplementary Materials: Identification of the Anti-Aflatoxinogenic Activity of *Micromeria graeca* and Elucidation of its Molecular Mechanism in *Aspergillus flavus*

Rhoda El Khoury, Isaura Caceres, Olivier Puel, Sylviane Bailly, Ali Atoui, Isabelle P. Oswald, André El Khoury and Jean-Denis Bailly

**Table S1.** Gene expression ratio values of AFB<sub>1</sub> cluster genes upon hyssop addition. Ratios are obtained in comparison to control values.

| Gene                                 | Function of encoded protein          | Gene expression ratio | SEM   | Fold change | p-value |
|--------------------------------------|--------------------------------------|-----------------------|-------|-------------|---------|
| <i>AFB<sub>1</sub> cluster genes</i> |                                      |                       |       |             |         |
| <i>aflR</i>                          | Zn-finger transcription factor       | 0.31                  | 0.053 | 3.2         | <0.0001 |
| <i>aflS</i>                          | AFLR co-activator                    | 0.35                  | 0.069 | 2.8         | <0.0001 |
| <i>aflT</i>                          | MFS-transporter                      | 0.43                  | 0.055 | 2.3         | <0.0001 |
| <i>aflA</i>                          | Fatty acid synthase                  | 0.08                  | 0.019 | 12.2        | <0.0001 |
| <i>aflB</i>                          | Fatty acid synthase                  | 0.08                  | 0.018 | 12.3        | <0.0001 |
| <i>aflC</i>                          | Polyketide synthase                  | 0.07                  | 0.029 | 14.7        | 0.00058 |
| <i>hypC</i>                          | Noranthrone oxidase                  | 0.01                  | 0.003 | 167.2       | <0.0001 |
| <i>aflD</i>                          | Ketoreductase                        | 0.06                  | 0.022 | 16.8        | <0.0001 |
| <i>aflE</i>                          | Deshydrogenase                       | 0.06                  | 0.019 | 17.8        | <0.0001 |
| <i>aflG</i>                          | Cytochrome P-450 mono-oxygenase      | 0.11                  | 0.042 | 9.3         | <0.0001 |
| <i>aflH</i>                          | Deshydrogenase                       | 0.04                  | 0.011 | 24.8        | <0.0001 |
| <i>aflI</i>                          | Flavin-dependent oxidoreductase      | 0.02                  | 0.007 | 60.7        | 0.00043 |
| <i>aflV</i>                          | Microsomal Cyt. P-450 mono-oxygenase | 0.05                  | 0.012 | 19.8        | <0.0001 |
| <i>aflJ</i>                          | Esterase                             | 0.06                  | 0.020 | 18.0        | <0.0001 |
| <i>aflK</i>                          | Cyclase                              | 0.07                  | 0.019 | 14.9        | <0.0001 |
| <i>aflL</i>                          | Desaturase                           | 0.05                  | 0.015 | 19.2        | <0.0001 |
| <i>aflM</i>                          | Ketoreductase                        | 0.12                  | 0.053 | 8.4         | 0.00120 |
| <i>aflN</i>                          | Cytochrome P-450 mono-oxygenase      | 0.03                  | 0.010 | 34.0        | <0.0001 |
| <i>aflX</i>                          | Oxidoreductase                       | 0.02                  | 0.008 | 50.4        | <0.0001 |
| <i>aflO</i>                          | O-methyl transferase (I)             | 0.00                  | 0.000 | 468.8       | <0.0001 |
| <i>aflP</i>                          | O-methyl transferase (II)            | 0.03                  | 0.010 | 29.7        | <0.0001 |
| <i>aflQ</i>                          | Cytochrome P-450 mono-oxygenase      | 0.07                  | 0.027 | 13.4        | <0.0001 |
| <i>hypB</i>                          | Hypothetical protein                 | 0.03                  | 0.016 | 35.8        | 0.00085 |
| <i>aflW</i>                          | Cytosolic mono-oxygenase             | 0.07                  | 0.019 | 14.7        | <0.0001 |
| <i>aflY</i>                          | Baeyer-Villiger mono-oxygenase       | 0.02                  | 0.009 | 45.8        | <0.0001 |
| <i>hypD</i>                          | Integral membrane protein            | 0.11                  | 0.024 | 9.4         | <0.0001 |
| <i>hypE</i>                          | Hypothetical protein                 | 0.05                  | 0.011 | 18.5        | 0.00018 |

Table S1. Cont.

| Gene                                        | Function of encoded protein              | Gene expression ratio | SEM  | Fold change | p-value |
|---------------------------------------------|------------------------------------------|-----------------------|------|-------------|---------|
| <i>Secondary metabolism regulator genes</i> |                                          |                       |      |             |         |
| <i>abaA</i>                                 | Developmental TF                         | 0.63                  | 0.17 | 1.58        | 0.23329 |
| <i>ap-1</i>                                 | bZIP TF (Oxidative stress response)      | 1.02                  | 0.12 | 1.02        | 0.63484 |
| <i>areA</i>                                 | Environmental GATA TF (Nitrogen)         | 1.71                  | 0.25 | 1.71        | 0.0215  |
| <i>atfA</i>                                 | bZIP TF (Oxidative stress response)      | 0.84                  | 0.14 | 1.18        | 0.50247 |
| <i>cat2</i>                                 | Catalase (Oxidative stress response)     | 0.33                  | 0.04 | 3.04        | <0.0001 |
| <i>catA</i>                                 | Catalase (Oxidative stress response)     | 0.45                  | 0.05 | 2.23        | 0.004   |
| <i>creA</i>                                 | Environmental Zn TF (Carbon)             | 2.50                  | 0.90 | 2.50        | 0.09569 |
| <i>brlA</i>                                 | Developmental Zn finger TF               | 1.54                  | 0.33 | 1.54        | 0.10605 |
| <i>fadA</i>                                 | G-protein signaling pathway              | 1.47                  | 0.48 | 1.47        | 0.78896 |
| <i>fcr3</i>                                 | Global bZIP TF                           | 0.82                  | 0.06 | 1.22        | 0.05987 |
| <i>flbA</i>                                 | Developmental regulator                  | 1.40                  | 0.19 | 1.40        | 0.07493 |
| <i>fluG</i>                                 | Developmental regulator                  | 0.77                  | 0.12 | 1.30        | 0.27419 |
| <i>gprA</i>                                 | G-protein receptor                       | 0.70                  | 0.19 | 1.44        | 0.15496 |
| <i>gprG</i>                                 | G-protein receptor                       | 1.33                  | 0.18 | 1.33        | 0.09379 |
| <i>gprH</i>                                 | G-protein receptor                       | 0.49                  | 0.01 | 2.06        | 0.0006  |
| <i>gprK</i>                                 | G-protein receptor                       | 2.00                  | 0.17 | 2.00        | <0.0001 |
| <i>gprP</i>                                 | G-protein receptor                       | 1.19                  | 0.07 | 1.19        | 0.23350 |
| <i>laeA</i>                                 | Velvet complex                           | 1.10                  | 0.18 | 1.10        | 0.53537 |
| <i>meaB</i>                                 | Environmental bZIP TF (Nitrogen)         | 1.14                  | 0.14 | 1.14        | 0.31329 |
| <i>mnsod</i>                                | Mn superoxide dismutase                  | 0.49                  | 0.09 | 2.04        | 0.0007  |
| <i>msnA</i>                                 | Zn finger TF (Oxidative stress response) | 3.25                  | 0.77 | 3.25        | 0.0126  |
| <i>mtfA</i>                                 | Zn finger TF (Oxidative stress response) | 1.93                  | 0.17 | 1.93        | 0.0001  |
| <i>nsdC</i>                                 | Global Zn finger TF                      | 1.54                  | 0.18 | 1.54        | 0.0122  |
| <i>pacC</i>                                 | Environmental Zn finger TF (pH)          | 1.64                  | 0.11 | 1.64        | <0.0001 |
| <i>ppoA</i>                                 | Oxylipin                                 | 0.87                  | 0.05 | 1.15        | 0.19087 |
| <i>ppoB</i>                                 | Oxylipin                                 | 0.85                  | 0.10 | 1.18        | 0.17278 |
| <i>ppoC</i>                                 | Oxylipin                                 | 1.50                  | 0.14 | 1.50        | 0.003   |
| <i>rasA</i>                                 | Ras-family signaling pathway             | 2.36                  | 0.65 | 2.36        | 0.05524 |
| <i>sod1</i>                                 | CuZn superoxide dismutase                | 0.60                  | 0.05 | 1.67        | 0.013   |
| <i>srrA</i>                                 | bZIP TF (Oxidative stress response)      | 1.44                  | 0.13 | 1.44        | 0.0017  |
| <i>stuA</i>                                 | Developmental factor                     | 1.76                  | 0.44 | 1.76        | 0.0012  |
| <i>veA</i>                                  | Velvet complex                           | 3.76                  | 0.44 | 3.76        | <0.0001 |
| <i>velB</i>                                 | Velvet complex                           | 1.03                  | 0.10 | 1.03        | 0.63158 |
| <i>vosA</i>                                 | Velvet complex                           | 0.85                  | 0.14 | 1.05        | 0.87741 |
